# Supplementary material
Source: PubMed Central journal article supplement (PMC3552299)

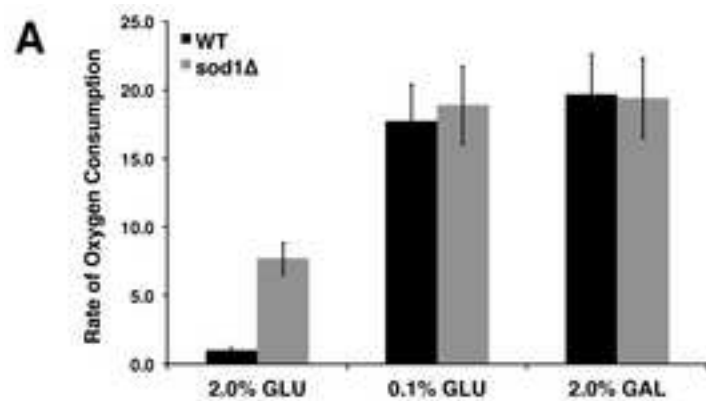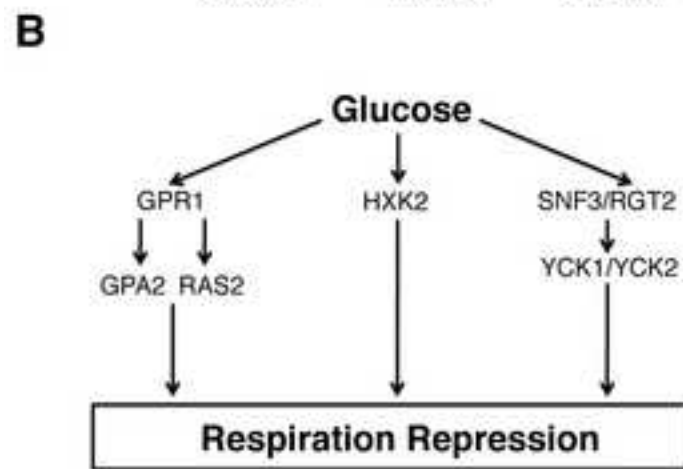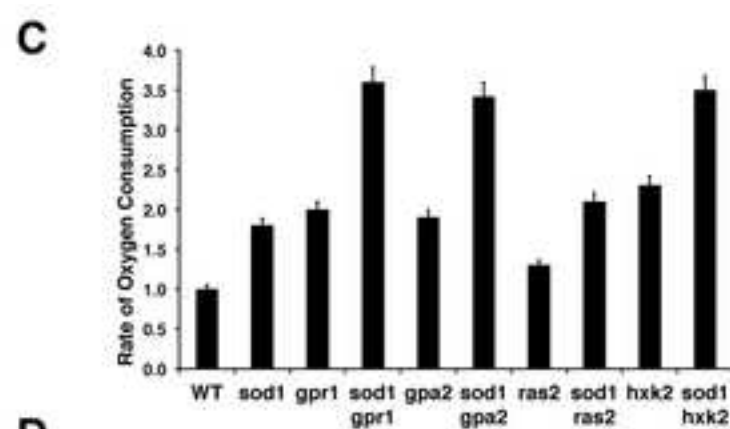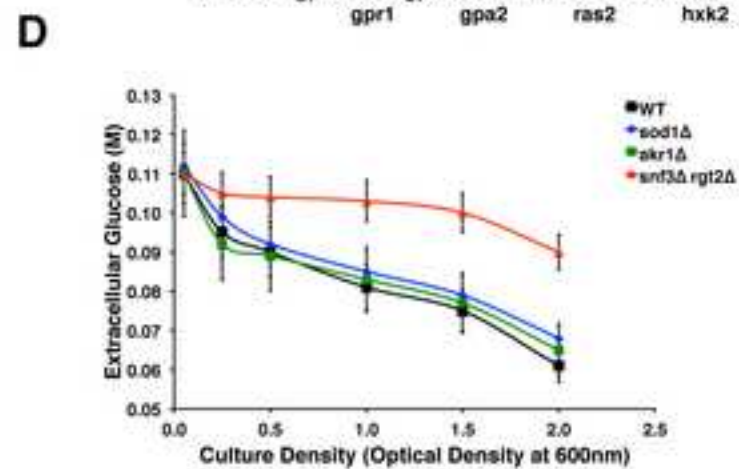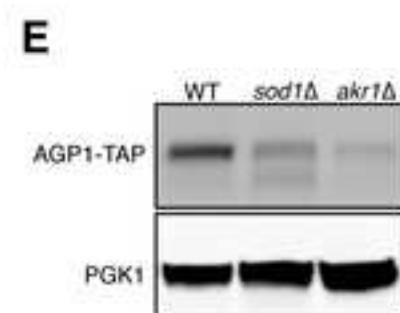

**A**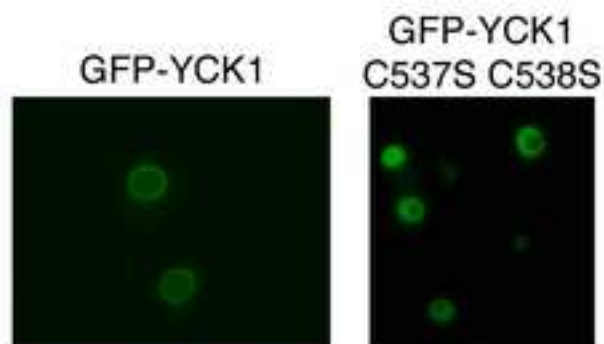**B**

 Kinase Domain  
 Engineered Stop Codons

```

YCK1      1  .... MSMP IASTT LAVNNLTN INGNANFNVOANKQLHHQAYDSPARSSMTATT AANSNSNSSRRDST I VGLHYKIGKKIGEGSFGVL 83
YCK2      1  MSQVQSPLTATNSGLAVNNNTMNSOMPNRNVRLVNGTLPSSLHVSSNLNHNHTGNSSASYSGSOSRDDST I VGLHYKIGKKIGEGSFGVL 90
YCK3      1  .... MSQRSSOH I VGIHYAVGPKIGEGSFGV I 28
HRR25     1  .... MDL RVGRKFR IGRKIGSBSFGD I 23

YCK1     84  FEGT --- NM I N --- GVPVA I XFEPRKTEAPQL RDEYKTYK I L NGTPN I PYAYYFGOEGLNH I L V I DLLGPSLEDL F 153
YCK2     91  FEGT --- NM I N --- GLPVA I XFEPRKTEAPQL KDEYRTYK I L ADTPG I POEY YFGOEGLNH I L V I DLLGPSLEDL F 160
YCK3     29  FEGE --- N I L HSCQAQTGSKRDSS I I MANEPVA I XFEPRHSDAPQL RDEFRAYR I L N GCVG I PHAYYFGOEGMHN I L I I DLLGPSLEDL F 115
HRR25    24  YHGTNL I S --- GEEVA I XLES I RSRHPQL DYESRVYR I L SGGVG I P F I RWFGREGEY NAMV I DLLGPSLEDL F 93

YCK1    154  DWCGRKF SVKT VVQVA VQMI TL I EDL RAHDL I YRDIKPNFL I GRPGQP --- DANN I HL I DFGMAKQYRDPKT KOH I 227
YCK2    161  DWCGRRF SVKT VVQVA VQMI TL I EDL RAHDL I YRDIKPNFL I GRPGQP --- DANKVHL I DFGMAKQYRDPKT KOH I 234
YCK3    116  EWCGRKF SVKT T CMVA KQMI DRVRA I HDHDL I YRDIKPNFL I SQYQR I SPEGKV I KSCASSSNDPNL I YMVDFGMAKQYRDPRT KOH I 205
HRR25    94  NYCHRRF SFKTY I MLALQMF CR I QY I HGRSF I HRDIKPNFL MGVGRG --- STVHV I DFGLSK KYRDFNT HRH I 165

YCK1    228  PYREK KSL SGTARYMS I NTHL GREQSRDDMEALGHVFF YFLRGHL PWQGLKAPNNKOKYK I GEKKRSTNVYDLAOG - - LPVDFGRYLE 315
YCK2    235  PYREK KSL SGTARYMS I NTHL GREQSRDDMEAMGHVFF YFLRGQL PWQGLKAPNNKOKYK I GEKKRLTNVYDLAOG - - LP I QDFGRYLE 322
YCK3    206  PYREK KSL SGTARYMS I NTHF GREQSRDDL ESLGHVFF YFLRGLS PWQGLKAPNNKLYEK I GMTKOKLNPDDL L NNA I PYQF AT YLK 295
HRR25    166  PYRENKSL TGTARYASV NTHLG I EQSRDDL ESLGYL I YFCGSL PWQGLKATT KOKY DR I MEKKLNVSVET L CSG - - LPLEQEYMA 253

YCK1    316  I VRS L SFE CPDYEGYRK I L L SVL DDLGET ADGQYDWMK L NDGRGWDL N I N --- KKP NLHG YGHPNP - PNEKSKHRNKOLQMOQ 396
YCK2    323  I VRN L SFE ETPOYEGYRML I L L SVL DDLGET ADGQYDWMK L NGGRGWDL S I N --- KKP NLHG YGHPNP - PNEKSKHRNKHQYSS 403
YCK3    296  YARS L KFE DDPDYDYL I S L MDDALRLNDL KDDGHYDMD L NGGKGWN I K I N --- RRANLHG YGNPNPRVNGNTARNVNTNSKTR 377
HRR25    254  YCKN L KFE DKPDYLF LARL I FKDL S I KLEYHNDHL F DWTML RYTKAMVEKQRDLL I EKGD L NANSNAASASNST ONKSETFNK I KLLAMKK 343

YCK1    397  LQMQQLGQQQQQQYAQKTEADMRNSOYKPKLDPTSYEAYGHQTQOKY L QEQQKROQQK L QEQQLQEQQLQEQQLQEQQLQEQQLRATGQPPSQ 486
YCK2    404  PDHHHHYNQQQQQQQAQAQAQAQAQAKVQ - - OQQLGQAGAQQAANRYLOPPDDSHYDEEREASKLDPTSYEAYQQQTQOKYAGQQQKQM 490
YCK3    378  N TTPVATPKQQAQNSYNKDNKSKSR I SSNPQSFTKQOHV LKK I EPNSKY I PETHSNLQRP I KQSQSYDS I SHTQNSPFPVYSSSKANPKR 467
HRR25    344  FPTHFHYYKNEDKHNPSP E I KOOT I L N NNAASSLPEELLNALDKGMENLRQQQPQQVQSSQPQPQPQQLQDDPNGQRPNYYPEPLLQ 433

YCK1    487  PQAQTQSQQFGARYQPOQPSAALRTPEQHPNDDNSS - - - LAASHKGF FOKLGCC - - - - 538
YCK2    491  QQKSKQFANTGANGQTNKYPPYNAQPTANDEQNAKNAQAQRNSNKSSKGF FSKLGC - - - - 546
YCK3    468  S NNEHNLPNHYTNLANKN I NYOSORTNEQENDAYSODENDTFCSK I KYCCCCFC - - - - 524
HRR25    434  QQRDSQEQQQQVPMATTRATQYPPQ I NSNNFNTNQASVPPQMRSNPQQPPQDKPAGQS I WL 494

```

Supplemental Figure 3

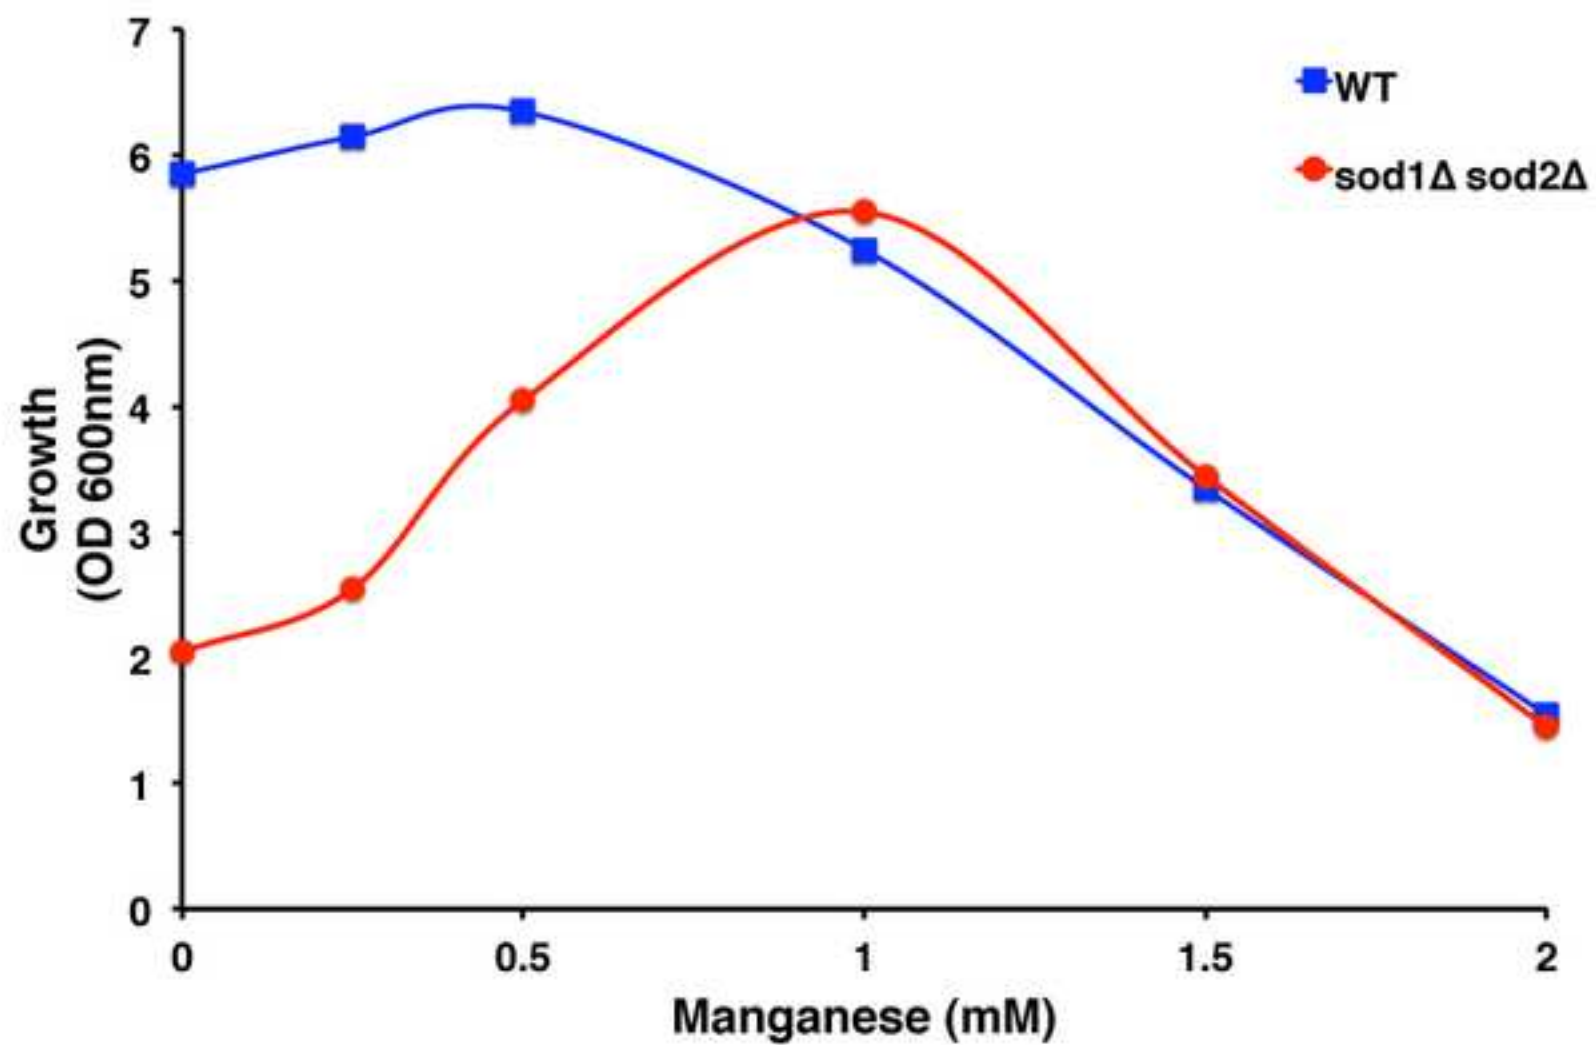

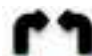

Kinase Domain

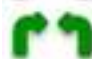

SOD1 Interacting Degron

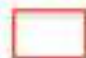

Lysines in SOD-Regulated Degron

|       |     |                     |                       |                         |                     |                   |
|-------|-----|---------------------|-----------------------|-------------------------|---------------------|-------------------|
|       |     | 10                  | 20                    | 30                      | 40                  |                   |
| YCK1  | 1   | -----MSMPIASTTLAVN  | NLTN                  | INGNANFN                | VQANKQL             | HHQAVD 38         |
| YCK2  | 1   | MSQVQSPLTATNSGLAVN  | NNNTMNSQMPN           | RSNVRLV                 | NGTLP               | PPSLHV 45         |
| CK1g3 | 1   | -----               |                       |                         | MENKKKKDKDKSD       | 12                |
|       |     | 50                  | 60                    | 70                      | 80                  |                   |
| YCK1  | 39  | SPARSSMTATTAANSNSNS | SRDDST                | I                       | VGLHYKIQKKIGEGSFGVL | 83                |
| YCK2  | 46  | SSNLNHNTGNSSASYSQS  | SRDDST                | I                       | VGLHYKIQKKIGEGSFGVL | 90                |
| CK1g3 | 13  | DRMARPSGRLGHNTRGTG  | SSSGVLMVGP            | NFRVQ                   | KKIGCGNFGEL         | 57                |
|       |     | 100                 | 110                   | 120                     | 130                 |                   |
| YCK1  | 84  | FEGTNMINGVPVAIKFEP  | RKTEAPQLRDEYKTYKILN   | -GTPNIPY                |                     | 127               |
| YCK2  | 91  | FEGTNMINGLPVAIKFEP  | RKTEAPQLKDEYRTYKILA   | -GTPGIPQ                |                     | 134               |
| CK1g3 | 58  | RLGKNLVTNEYVAIKLE   | PKSRAPQLHLEYRFYKQLG   | -SGDGI                  | PQ                  | 101               |
|       |     | 140                 | 150                   | 160                     | 170                 |                   |
| YCK1  | 128 | AYYFGQEGLHNILVIDLL  | GPSLEDFDWCGRKFSVKT    | VVQVAVOM                |                     | 172               |
| YCK2  | 135 | EYYFGQEGLHNILVIDLL  | GPSLEDFDWCGRRFVKT     | VVQVAVOM                |                     | 179               |
| CK1g3 | 102 | VYYFGPCGKYNAMVLELL  | GPSLEDFDLCORTFSLKTV   | LMIAIQL                 |                     | 146               |
|       |     | 190                 | 200                   | 210                     | 220                 |                   |
| YCK1  | 173 | ITLIEDLHAHDLIYRDI   | KPDNFI                | IGRPGQPDANNIHL          | IDFGMAKQ            | 217               |
| YCK2  | 180 | ITLIEDLHAHDLIYRDI   | KPDNFI                | IGRPGQPDANKVHL          | IDFGMAKQ            | 224               |
| CK1g3 | 147 | ISRMETVYVHSKNLIYR   | QVKPENFI              | IGRPGNKTOQVTHI          | IDFGLAKE            | 191               |
|       |     | 230                 | 240                   | 250                     | 260                 |                   |
| YCK1  | 218 | YRDPKTKQHI          | PYREKKSLSGTARYMS      | INTHLGREQSR             | RDDMEALG            | 262               |
| YCK2  | 225 | YRDPKTKQHI          | PYREKKSLSGTARYMS      | INTHLGREQSR             | RDDMEAMG            | 269               |
| CK1g3 | 192 | YIDRET              | KKHPIPYREHKSLTGTARYMS | INTHLGKEQSR             | RDDLEALG            | 236               |
|       |     | 280                 | 290                   | 300                     | 310                 |                   |
| YCK1  | 263 | HVFFYFLRGHLPWQGL    | KAPNNKQKYEKIGEK       | KRSTNVYDL               | AQGLP               | 307               |
| YCK2  | 270 | HVFFYFLRGQLPWQGL    | KAPNNKQKYEKIGEK       | KRLTNVYDL               | AQGLP               | 314               |
| CK1g3 | 237 | HMEMYFLBGS          | LPWQGLKAOTLKERYQK     | IGDTKRATPIEVL           | CENFP               | 281               |
|       |     | 320                 | 330                   | 340                     | 350                 |                   |
| YCK1  | 308 | VQFGRYLEIVRSL       | SFEPCPDYEGYRKLLSVL    | DDLGETADGOYDW           |                     | 352               |
| YCK2  | 315 | IQFGRYLEIVRNL       | SFEETPDYEGYRMLLSVL    | DDLGETADGOYDW           |                     | 359               |
| CK1g3 | 282 | -EMATYLRV           | VRRLEDFEKPDYDYL       | RKLF                    | TDLFD               | DRKGYMFDYEYDW 325 |
|       |     | 370                 | 380                   | 390                     | 400                 |                   |
| YCK1  | 353 | MKLNDRGWDLN         | INKKPNLHGYGHPNPPNEK   | SRKHRNKQL               | QMQL                | 397               |
| YCK2  | 360 | MKLNDRGWDLN         | INKKPNLHGYGHPNPPNEK   | SKRHRNKKNHQYSSP         |                     | 404               |
| CK1g3 | 326 | IGKQLPTPVGAVQDP     | -ALSSNREAH            | PHRCKQSKN               |                     | 360               |
|       |     | 410                 | 430                   | 440                     |                     |                   |
| YCK1  | 398 | QMQLQQQQQQQY        | AQKTEADM              | RNSQYKPKLDPTSYEAYOHQTQQ |                     | 442               |
| YCK2  | 405 | DHHHHYNQQQQQQQ      | AQAQAQAQAQAKVQ        | - - -                   | QQQLQAQAQQGAN       | 446               |
| CK1g3 | 361 | -----               |                       |                         | QVVSSTNGELNTDD      | 374               |
|       |     | 460                 | 470                   | 480                     | 490                 |                   |
| YCK1  | 443 | KYLOEQQKROQQQK      | LEEQQL                | LEEQQLQQQQQQQL          | RATGPPSOP           | 487               |
| YCK2  | 447 | RYQLQPDSSH          | YDEEREASKLDPTS        | SYEAYQQQTQ              | QKYAQQQOKOMQ        | 491               |
| CK1g3 | 375 | PTAGRSNAPITAPTE     | VEVMDETNCQKVL         | NMWCCCF                 | KRRKRKTID           | 419               |
|       |     | 500                 | 510                   | 520                     | 530                 |                   |
| YCK1  | 488 | QAQTQSQQFGARY       | QPQQQPSAAL            | RTPEQHPNDDN             | SS - - -            | LAASH 528         |
| YCK2  | 492 | QKSKQFANTGANG       | QTNKYRYNAQPT          | ANDEQNAKNA              | AQDRNSNKSS          | 536               |
| CK1g3 | 420 | RHK - - - - -       |                       |                         |                     | 422               |
|       |     | 529                 | 537                   |                         |                     |                   |
| YCK1  | 529 | KGFFOKL             | GCC                   |                         |                     | 538               |
| YCK2  | 537 | KGFFSKL             | GCC                   |                         |                     | 546               |
| CK1g3 |     | -----               |                       |                         |                     |                   |

IP: GFP-YCK1

GLU

GAL

Input

IP

Input

IP

$\alpha$ -GFP

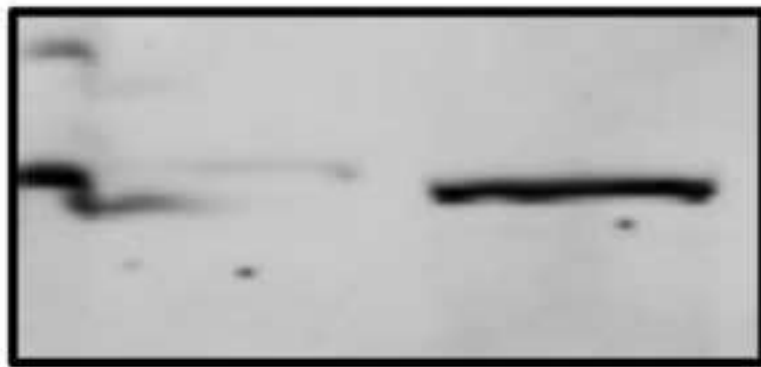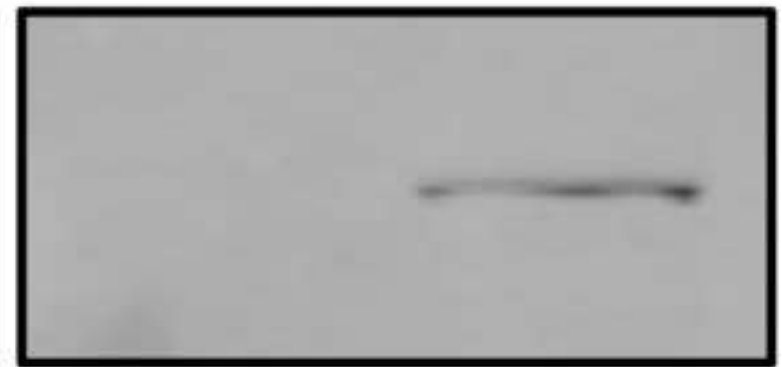

$\alpha$ -SOD1

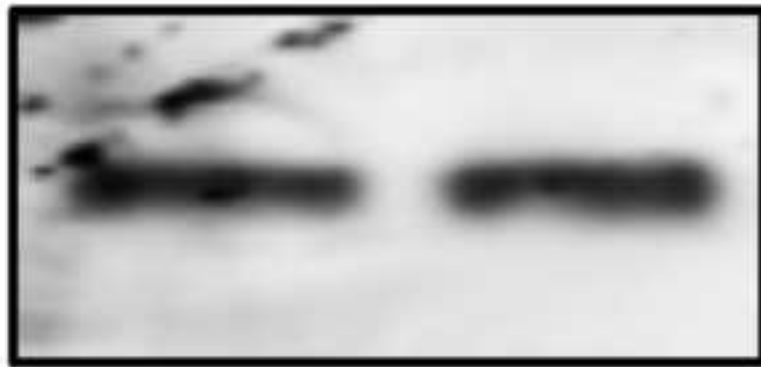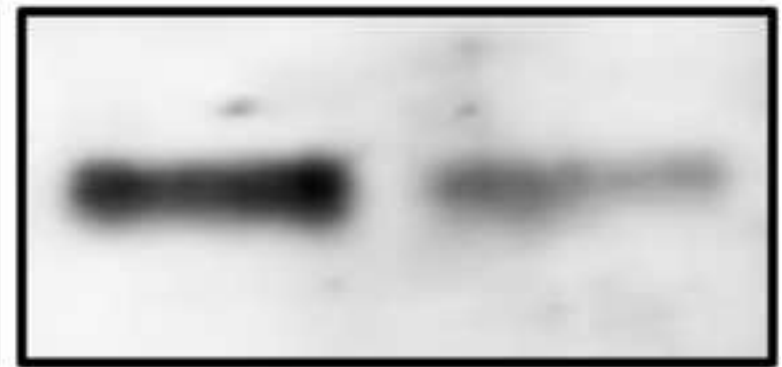

**A**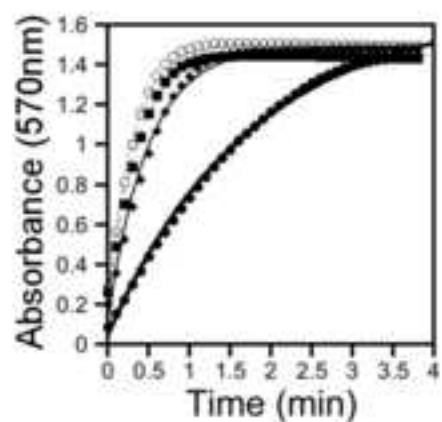**B**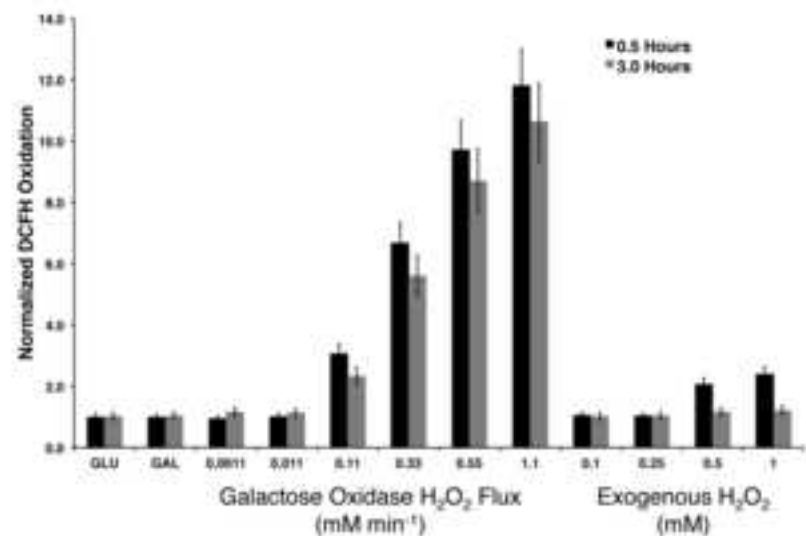**C**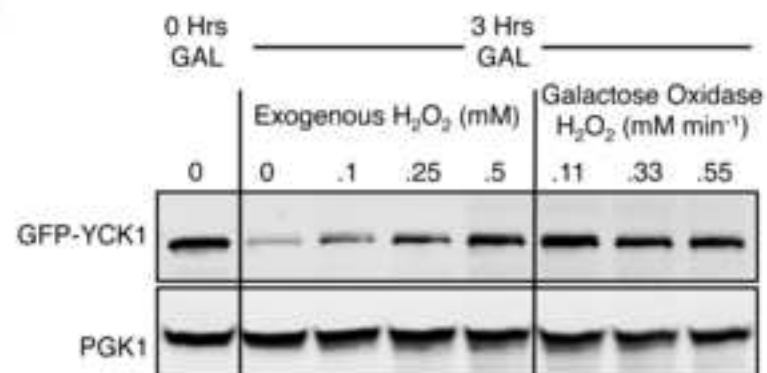**D**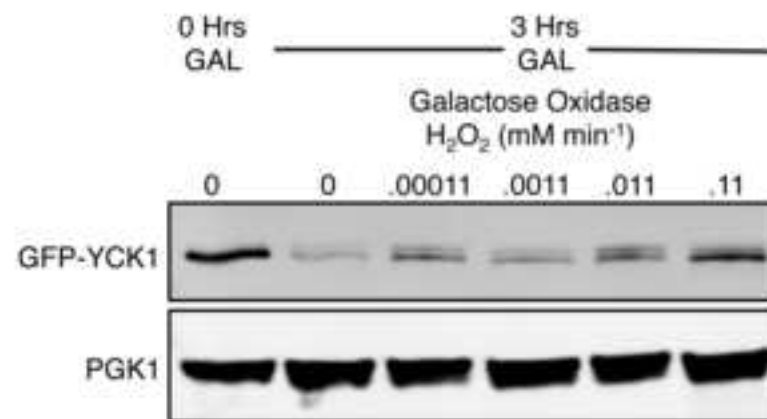**E**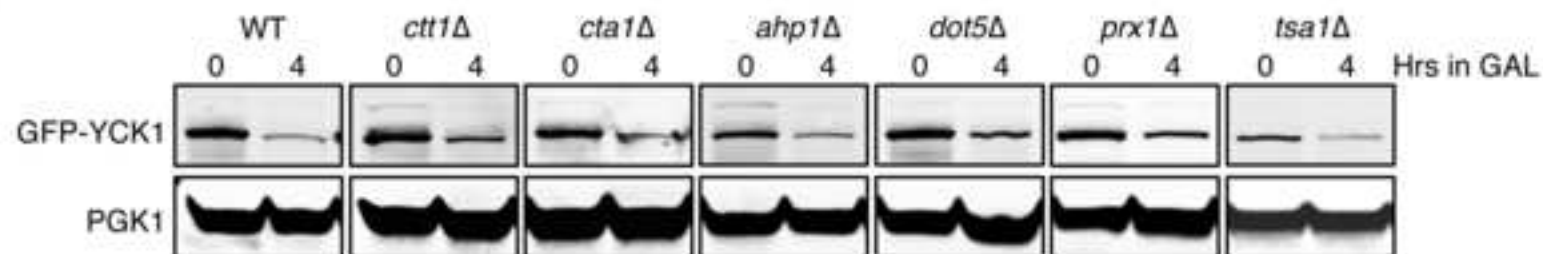

Supplement: NIHMS426578-supplement-02.pdf [file NIHMS426578-supplement-02.pdf]
